# Supplementary material for: Expeditious quantitative analysis of λ-cyhalothrin depending on fluorescence quenching of fluorescent surface molecularly imprinted sensors
Source: Royal Society of Chemistry journal article supplement (doi:10.1039/c5ay02721g), 2016-01-01
Supplement: c5ay02721g1.pdf [file c5ay02721g1.pdf]

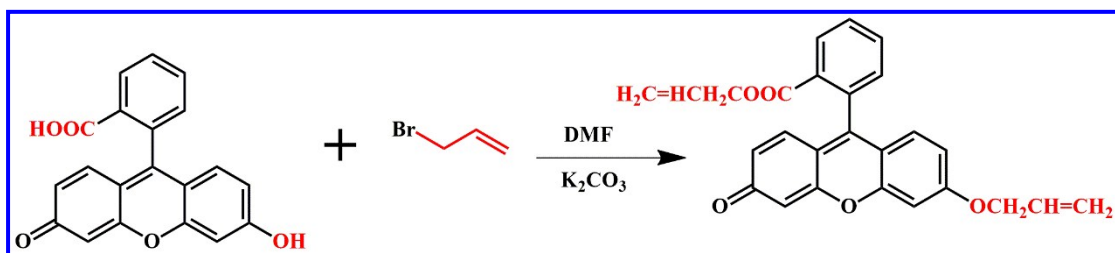

Fig S1 Synthetic scheme for allyl fluorescein

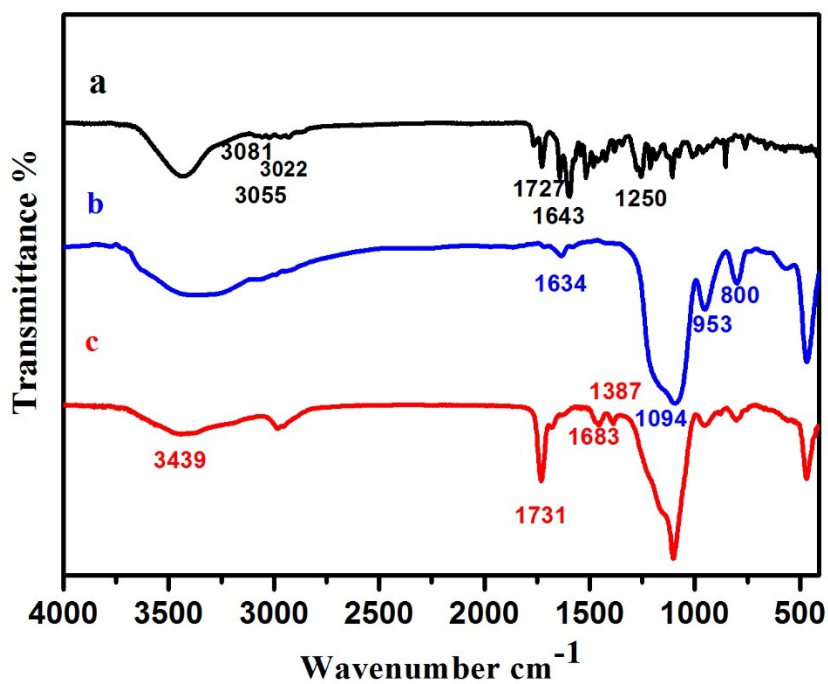

Fig. S2 FT-IR spectra of (a) allyl fluorescein, (b) SiO<sub>2</sub>-MPS, (c) SiO<sub>2</sub>-MPS@FMIP

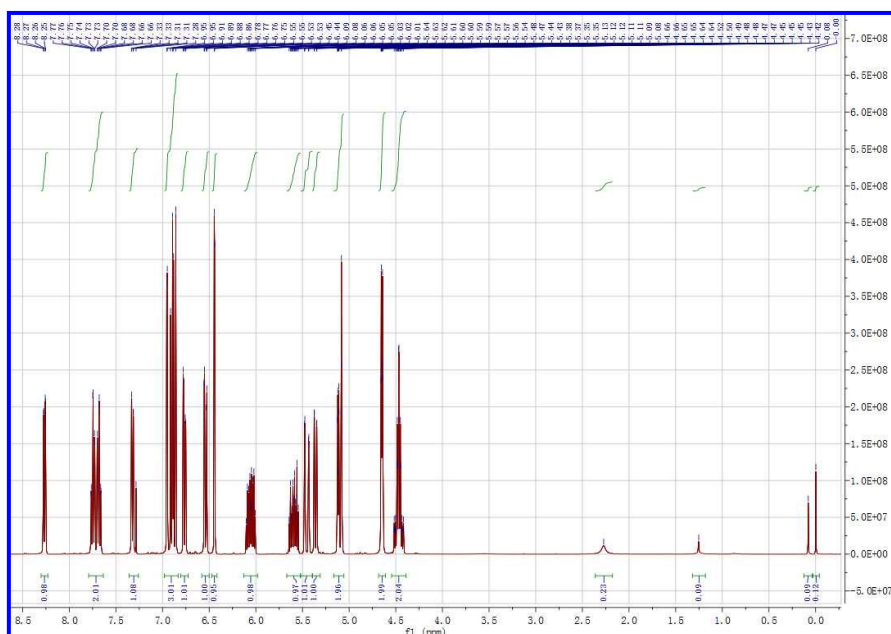

Fig S3 <sup>1</sup>H-NMR spectroscopy of allyl fluorescein

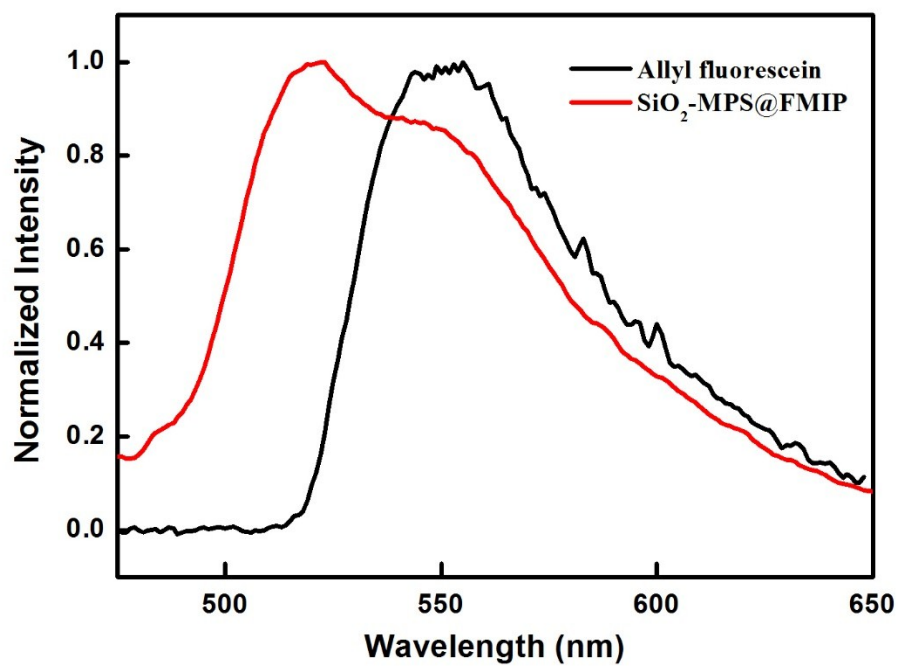

Fig.S4 Fluorescence spectra of allyl fluorescein and SiO<sub>2</sub>-MPS@FMIP
